# Supplementary material
Source: MDPI journal article supplement (https://www.mdpi.com/2673-8430/2/4/35)
Supplement: s1 [file s1]

Archive with 1 entries (1 files):
- biomed-1996391-supplementary.pdf
