# Supplementary material
Source: MDPI journal article supplement (https://www.mdpi.com/2673-8430/2/4/35)

# Acute vessel closure or major adverse cardiac events of drug-coated balloons and stents: A Systematic review and meta-analysis

## Supplementary Material

Tharusha Gunawardena <sup>1, 2</sup>, Natasha Corballis <sup>1, 2</sup>, Ioannis Merinopoulos <sup>1, 2</sup>, Vasiliki

Tsampasian <sup>1, 2</sup>, Johannes Reinhold <sup>1, 2</sup>, Simon Eccleshall <sup>1</sup>, Vassilios Vassiliou <sup>1, 2</sup>

<sup>1</sup> Department of cardiology, Norfolk and Norwich University Hospital

<sup>2</sup> Norwich Medical School, University of East Anglia

**Supplementary Figure S1:** Sensitivity analysis of major adverse cardiovascular events in  
DCBs compared to DESs

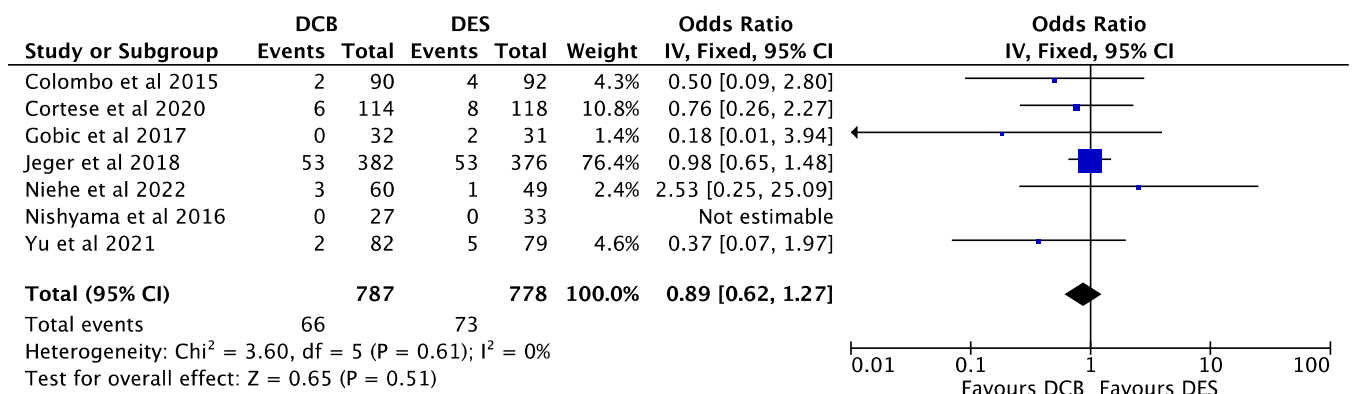

**Supplementary Figure S2:** Funnel plots for acute vessel closure (a), major adverse cardiovascular events (b) and target lesion revascularisation (c).

(a)

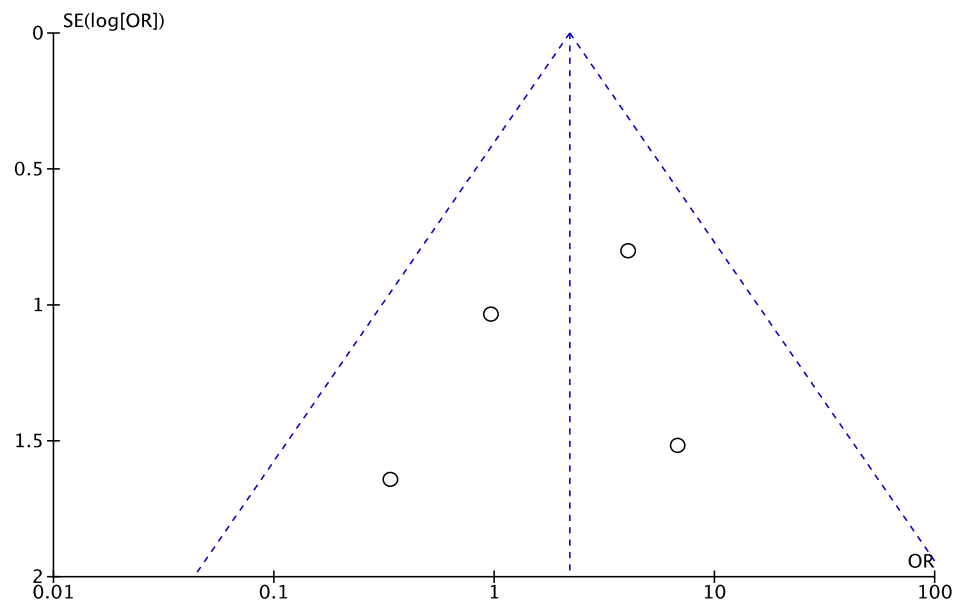

(b)

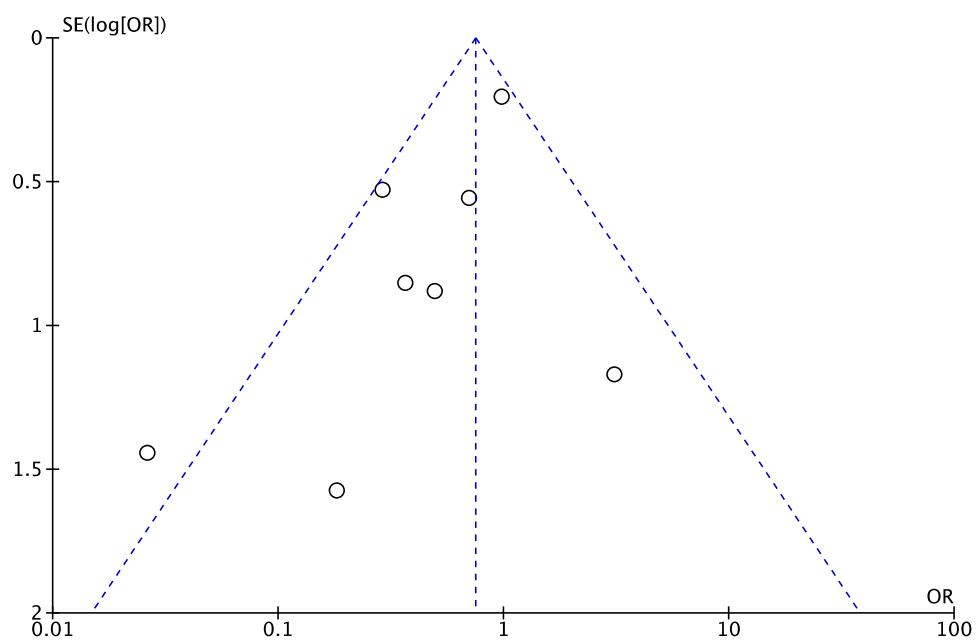

(c)

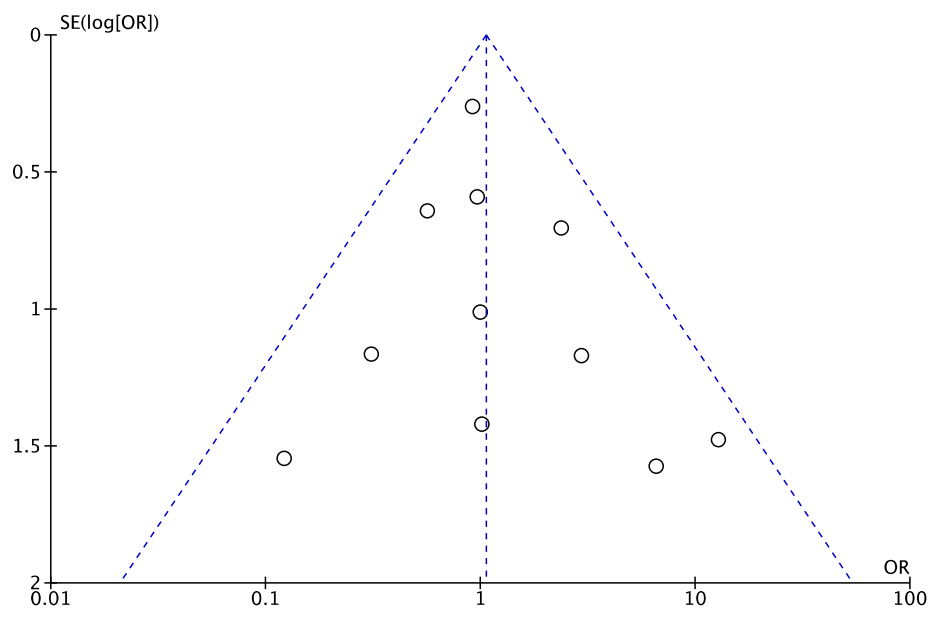

Supplement: s1 [file s1 › biomed-1996391-supplementary.pdf]
